# Supplementary material for: Boosting charge separation of Sr2Ta2O7 by Cr doping for enhanced visible light-driven photocatalytic hydrogen generation
Source: Royal Society of Chemistry journal article supplement (doi:10.1039/c9qi00506d), 2019-01-01
Supplement: c9qi00506d1.pdf [file c9qi00506d1.pdf]

## Electronic Supplementary Information

### **Boosting charge separation of Sr<sub>2</sub>Ta<sub>2</sub>O<sub>7</sub> by Cr doping for enhanced visible light-driven photocatalytic hydrogen generation**

Weixuan Zeng,<sup>a</sup> Sheng Cao,<sup>b</sup> Lulu Qiao,<sup>a</sup> Anquan Zhu,<sup>a</sup> Quanyin Ma,<sup>a</sup> Xiewen Xu,<sup>c</sup> Yi Chen,<sup>d\*</sup> Jun Pan<sup>a\*</sup>

<sup>a</sup>State Key Laboratory of Powder Metallurgy, Central South University, Changsha, Hunan 410083, P. R. China

<sup>b</sup>School of Physical Science and Technology, Guangxi University, Nanning 530004, P. R. China

<sup>c</sup>College of Material Science and Engineering, Changsha University of Science and Technology, Changsha, Hunan 410083, P. R. China

<sup>d</sup>Hunan Provincial Key Laboratory of Comprehensive Utilization of Agricultural and Animal Husbandry Waste Resources, College of Urban and Environmental Sciences, Hunan University of Technology, Zhuzhou, 412007, P. R. China

### **Deposition of cocatalysts**

Cocatalysts Pt were deposited by an impregnation method and subsequent H<sub>2</sub> reduction. In brief, 200 mg of the as-obtained photocatalysts were poured into a small beaker, and then 2 mL of H<sub>2</sub>PtCl<sub>6</sub> aqueous solution (10 mg mL<sup>-1</sup>) was added under ultrasonic conditions and held for 5 min. After that, the beaker was placed in a thermostatic water bath, and the temperature was controlled at 353 K. Until the solution was entirely evaporated, the resulting products were put into an alumina crucible. Finally, the product was placed in a tube furnace under the reduction atmosphere (5% H<sub>2</sub>/Ar, 200 mL min<sup>-1</sup>) at 623 K for 1 h.

### **Preparation of working electrodes**

The working electrodes were fabricated in the following steps: 20 mg photocatalyst was dispersed in 1500 μL ethanediol and 500 μL deionized water that contained 50 μL Nafion aqueous solution, and then the solution was fully stirred. Next, 100 μL of the above slurry was dropped on a fluorine-doped tin oxide (1 cm × 1 cm) conducting glass and then annealed for 2 h in a vacuum oven at 473 K.

### **Biexponential mode**

The PL decay curves were fitted using a biexponential mode:<sup>1</sup>

$$I(t) = A_1 \exp(-t/\tau_1) + A_2 \exp(-t/\tau_2),$$

The average fluorescent lifetime of as-prepared photocatalysts are estimated by the equation:

$$\tau = \frac{A_1 \tau_1^2 + A_2 \tau_2^2}{A_1 \tau_1 + A_2 \tau_2}$$

where A<sub>1</sub>, A<sub>2</sub> and y<sub>0</sub> are amplitude coefficient. τ<sub>1</sub> and τ<sub>2</sub> are the lifetimes corresponding to different recombination pathways.

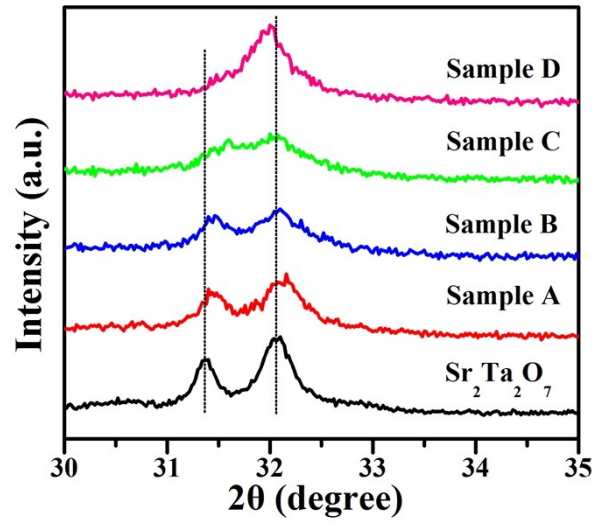

Fig. S1. Magnified (002) and (022) peaks of of Sr<sub>2</sub>Ta<sub>2</sub>O<sub>7</sub> obtained by hydrothermal method and Cr-doped Sr<sub>2</sub>Ta<sub>2</sub>O<sub>7</sub> with different Cr doping content.

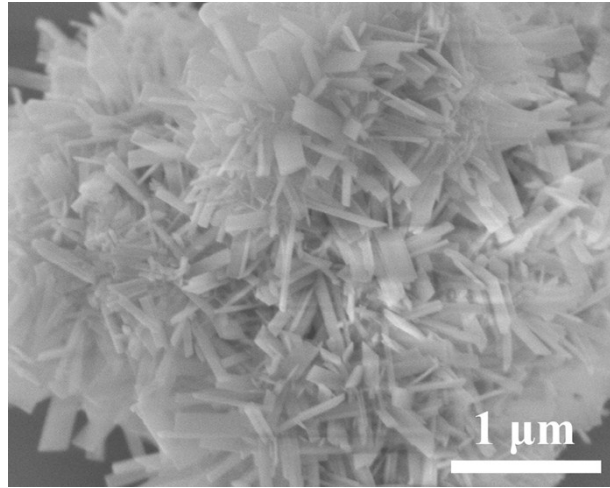

Fig. S2. SEM image of Sr<sub>2</sub>Ta<sub>2</sub>O<sub>7</sub>.

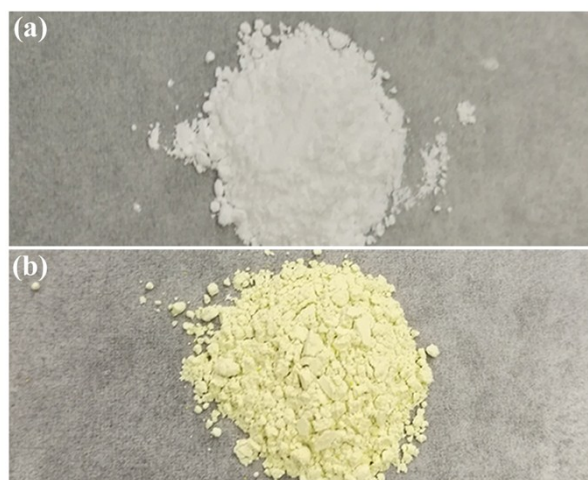

Fig. S3. Digital photograph of (a)  $\text{Sr}_2\text{Ta}_2\text{O}_7$  and (b) Sample C.

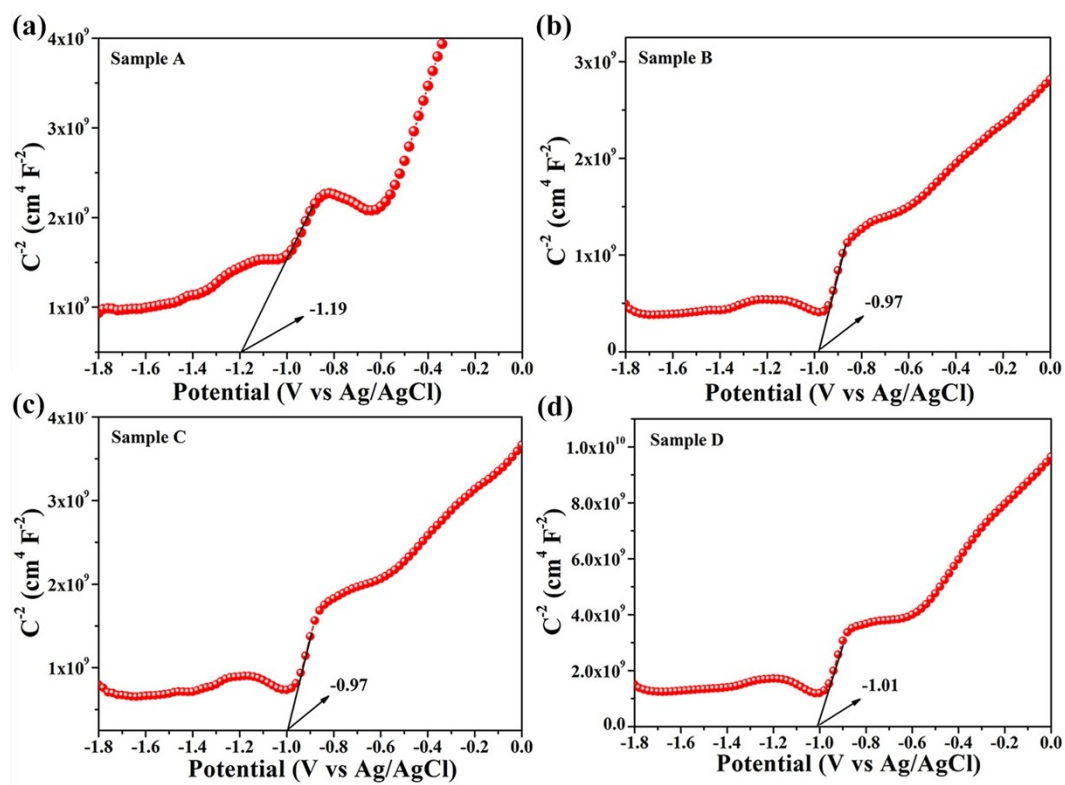

Fig. S4. Mott-Schottky curves of Sr<sub>2</sub>Ta<sub>2</sub>O<sub>7</sub> and Sample A-D.

Table S1. Photocatalytic performance comparison of our work and some of the tantalum oxynitrides under visible-light irradiation ( $\lambda \geq 420$  nm)

| Entry | Photocatalyst                                                                                        | H <sub>2</sub> evolution rates<br>( $\mu\text{mol h}^{-1} \text{g}^{-1}$ ) | Sacrificial agent        | Reaction<br>Temperature | Reference |
|-------|------------------------------------------------------------------------------------------------------|----------------------------------------------------------------------------|--------------------------|-------------------------|-----------|
| 1     | Cr-doped<br>Sr <sub>2</sub> Ta <sub>2</sub> O <sub>7</sub><br>Ta <sub>3</sub> N <sub>5</sub> @NaTaON | 9.32                                                                       | 15 vol%<br>methanol      | 279 K                   | Our work  |
| 2     | nanocubes (1 wt%<br>Pt cocatalyst)                                                                   | ~8.80                                                                      | methanol                 | -                       | 2         |
| 3     | Pt@Ta <sub>3</sub> N <sub>5</sub> -WO <sub>2.72</sub>                                                | 7.74                                                                       | 20 vol%<br>methanol      | -                       | 3         |
| 4     | Ta <sub>3</sub> N <sub>5</sub> /BTON (0.<br>3wt% Pt)                                                 | 182                                                                        | 20 vol%<br>methanol      | Room<br>temperature     | 4         |
| 5     | SrTaO <sub>2</sub> N<br>nanoplates                                                                   | 14.75                                                                      | 10 vol%<br>methanol      | -                       | 5         |
| 6     | BMTON/Ta <sub>3</sub> N <sub>5</sub> (0.<br>4)(0.5 wt% Pt)                                           | 68                                                                         | NaI solution (0.8<br>mM) | Room<br>temperature     | 6         |

## References:

1. Z. Zhang, J. Huang, Y. Fang, M. Zhang, K. Liu and B. Dong, *Adv. Mater.*, 2017, **29**, 1606688.
2. J. Hou, Y. Wu, S. Cao, F. Liang, Z. Lin, Z. Gao and L. Sun, *Adv. Energy Mater.*, 2017, **7**, 1700171.
3. W.-P. Hsu, M. Mishra, W.-S. Liu, C.-Y. Su and T.-P. Perng, *Appl. Catal., B*, 2017, **201**, 511-517.
4. B. Dong, J. Cui, Y. Gao, Y. Qi, F. Zhang and C. Li, *Adv. Mater.*, 2019, **31**, 1808185.
5. J. Fu and S. E. Skrabalak, *Angew. Chem.*, 2017, **129**, 14357-14361.
6. J. Cui, Y. Qi, B. Dong, L. Mu, Q. Ding, G. Liu, M. Jia, F. Zhang and C. Li, *AAppl. Catal., B*, 2019, **241**, 1-7.
